# Supplementary material for: Biodegradable Cellulose/Polycaprolactone/Keratin/Calcium Carbonate Mulch Films Prepared in Imidazolium-Based Ionic Liquid
Source: MDPI journal article supplement (doi:10.3390/polym15122729), 2023-06-18
Supplement: s1 [file s1]

# Biodegradable cellulose/polycaprolactone/keratin/calcium carbonate mulch films prepared in imidazolium-based ionic liquid

Dušica Stojanović<sup>1</sup>, Aleksandra Ivanovska<sup>2,\*</sup>, Nemanja Barać<sup>2</sup>, Katarina Dimić-Misić<sup>3</sup>, Mirjana Kostić<sup>1</sup>, Vesna Radojević<sup>1</sup>, Djordje Janačković<sup>1,2</sup>, Petar Uskoković<sup>1</sup>, Ernest Barceló<sup>3</sup> and Patrick Gane<sup>1,3,\*</sup>

<sup>1</sup>Faculty of Technology and Metallurgy, University of Belgrade, Karnegijeva 4, 11000 Belgrade, Serbia; duca@tmf.bg.ac.rs (D.S.); kostic@tmf.bg.ac.rs (M.K.); vesnar@tmf.bg.ac.rs (V.R.); nht@tmf.bg.ac.rs (D.J.); puskokovic@tmf.bg.ac.rs (P.U.)

<sup>2</sup>Innovation Center of the Faculty of Technology and Metallurgy in Belgrade Ltd., University of Belgrade, Karnegijeva 4, 11000 Belgrade, Serbia; nbarac@tmf.bg.ac.rs

<sup>3</sup>Department of Bioproducts and Biosystems, School of Chemical Engineering, Aalto University, 00076 Helsinki, Finland; katarina.dimic-misic@metsagroup.com (K.D.-M.); ebarcelorodriguez@gestamp.com (E.B.)

\* Correspondence: aivanovska@tmf.bg.ac.rs (A.I.); patrick.gane@aalto.fi (P.G.)

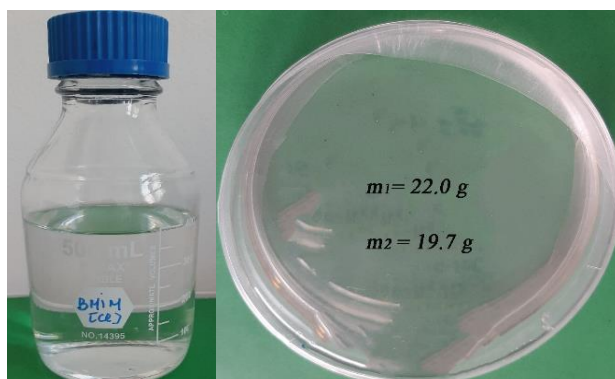

**Figure S1.** Regeneration of ionic liquid [BMIM][Cl] (1-Butyl-3-methylimidazolium chloride): left - aqueous solution of [BMIM][Cl] obtained after mulch film regeneration and extraction/washing; right - regenerated [BMIM][Cl],  $m_1$ -mass of [BMIM][Cl] used in experiment and  $m_2$ -mass of regenerated [BMIM][Cl]

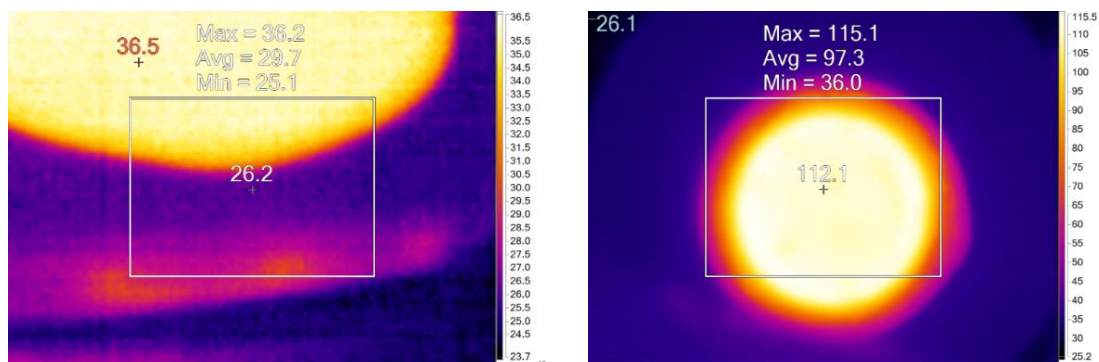

**Figure S2.** Thermal infrared images ultrasonic dispersion of the GCC in [BMIM][Cl] solution. The temperature of the dispersion increased from 36.5 °C to 112.1 °C after 7 min exposure to ultrasonication.

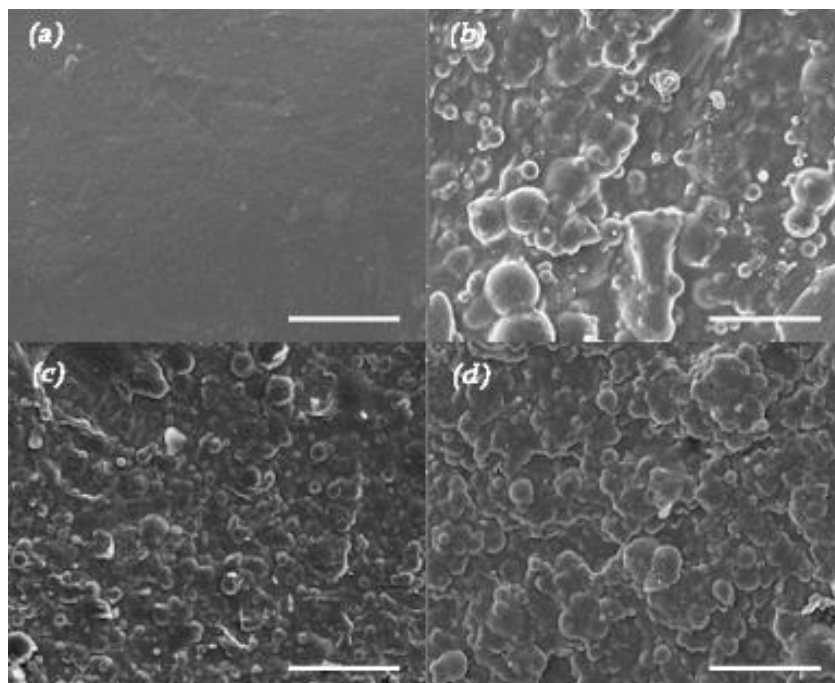

**Figure S3.** FE-SEM micrographs of the surfaces of (a) CELL, (b) CELL/PCL, (c) CELL/PCL/KER, and (d) CELL/PCL/KER/GCC (scale bar = 200  $\mu\text{m}$ )

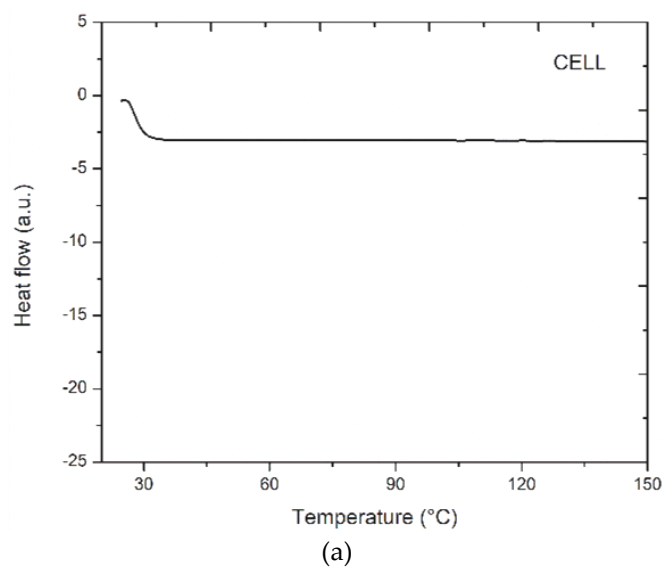

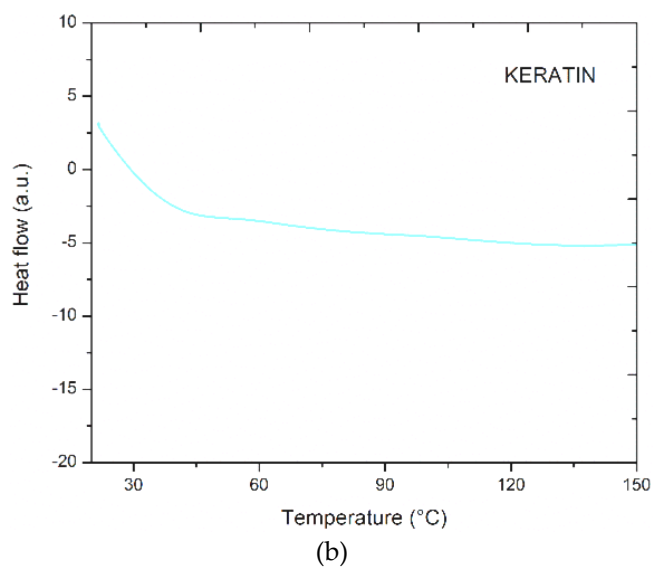

**Figure S4.** DSC analysis of (a) neat cellulose (CELL), and (b) keratin (KER).

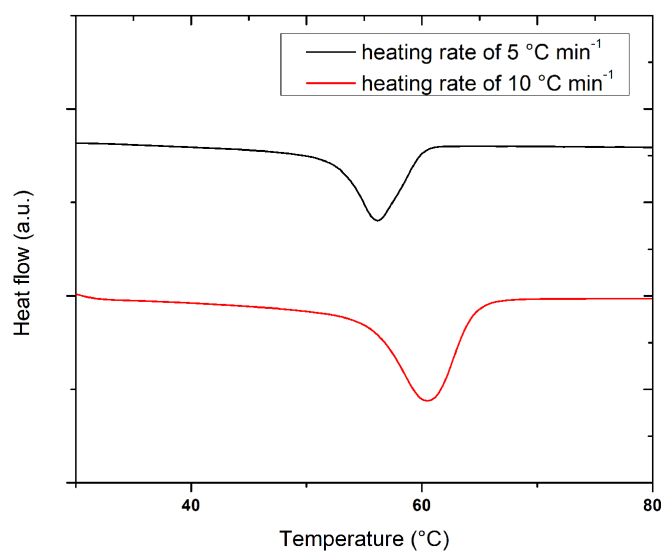

**Figure S5.** DSC analysis of CELL/PCL/KER/GCC biocomposite films at different heating rates: 5 and 10 °C min<sup>-1</sup>

**Table S1** The weight loss ( $W_L$  (%)) of the cellulose and biocomposite films during the biodegradability test

| Day | $W_L$ (%) |          |              |                  |
|-----|-----------|----------|--------------|------------------|
|     | CELL      | CELL/PCL | CELL/PCL/KER | CELL/PCL/KER/GCC |
| 7   | 21.22     | 13.86    | 16.65        | 16.16            |
| 14  | 46.96     | 19.03    | 25.34        | 22.18            |
| 21  | 52.03     | 22.40    | 45.22        | 38.32            |
| 28  | 59.12     | 37.06    | 52.18        | 43.62            |

**Table S2** The total content of calcium ions (Ca<sup>2+</sup>) in the mulch films (mg g<sup>-1</sup> and % (w/w))

| Sample                     | Total content of Ca <sup>2+</sup><br>ions in the mulch films |         |
|----------------------------|--------------------------------------------------------------|---------|
|                            | mg g <sup>-1</sup>                                           | % (w/w) |
| CELL/PCL/KER/GCC (0 days)  | 19.889                                                       | 1.989   |
| CELL/PCL/KER/GCC (28 days) | 0.562                                                        | 0.056   |

**Table S3** ATR-FTIR absorption bands characteristic of biopolymers and biocomposites

| Wavenumber, cm <sup>-1</sup> | Functional group                                     | Components |
|------------------------------|------------------------------------------------------|------------|
| 3000–3700                    | OH stretching                                        | all        |
| 3281                         | N–H stretching                                       | KER        |
| 1722                         | –C=O stretching                                      | PCL        |
| 1100–1710                    | amide region                                         | KER        |
| 1639                         | C=O stretching (amide I)                             | KER        |
| 1637                         | –C=O stretching                                      | CELL/PCL   |
| 1528                         | C–N stretching and N–H bending (amide II),           | KER        |
| 1232                         | C–O stretching and N–H and O=C–N bending (amide III) | KER        |
| 1418                         | Hydrogen intramolecular bonds                        | CEL        |
| 896                          | β-glycosidic linkage                                 | CEL        |
| 874                          | C–H out of plane glucose ring                        | CEL        |
